# Supplementary material for: Meta-gene markers predict meningioma recurrence with high accuracy
Source: PubMed Central journal article supplement (PMC7582964; doi:10.1038/s41598-020-74482-2), 2020-10-22
Supplement: 41598_2020_74482_MOESM1_ESM.pdf [file 41598_2020_74482_MOESM1_ESM.pdf]

**SUPPLEMENTAL FIGURE: Meta-gene markers predict meningioma recurrence with high accuracy independent of WHO grade**

Zsolt Zador\*<sup>1</sup>, Alexander P. Landry\*<sup>1</sup>, Benjamin Haibe-Kains<sup>2,3,4,5,6</sup>, Michael D. Cusimano<sup>1</sup>

1) Division of Neurosurgery, Department of Surgery, St. Michael's Hospital, Toronto, ON, Canada

2) Department of Computer Science, University of Toronto, Toronto, ON, Canada;

3) Department of Medical Biophysics, University of Toronto, Toronto, ON, Canada;

4) Princess Margaret Cancer Centre, University Health Network, Toronto, ON, Canada;

5) Ontario Institute for Cancer Research, Toronto, ON, Canada;

6) Vector Institute, Toronto, ON, Canada;

**Co-Corresponding Authors:**

Zsolt Zador

Division of Neurosurgery, Department of Surgery, St. Michael's Hospital,

Email: zadzso@gmail.com

Alexander Landry

Division of Neurosurgery, Department of Surgery, St. Michael's Hospital

Email: alex.landry@mail.utoronto.ca

**A**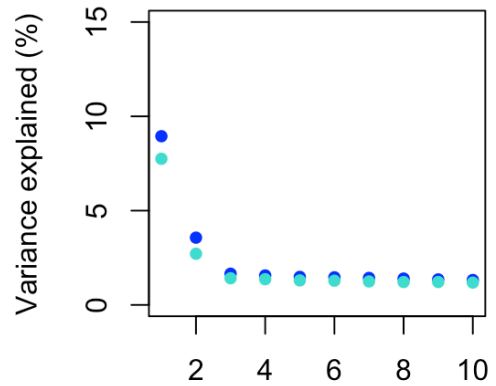

PC

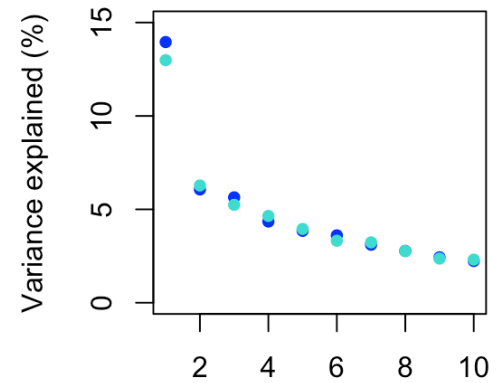

PC

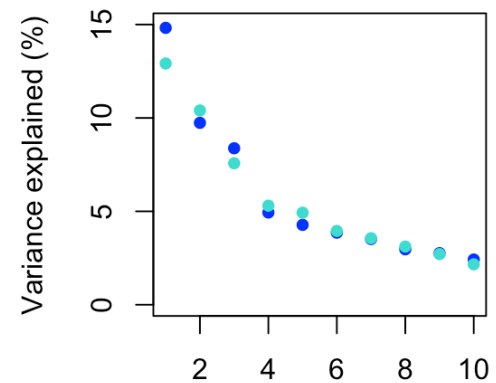

PC

**B**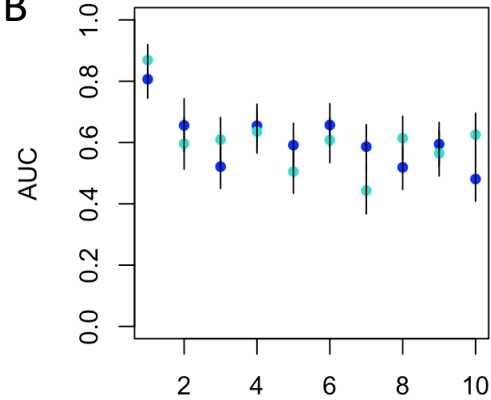

PC

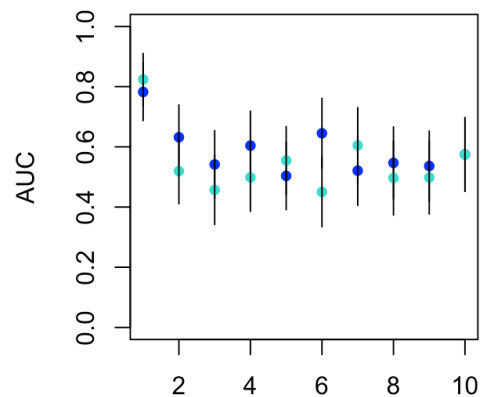

PC

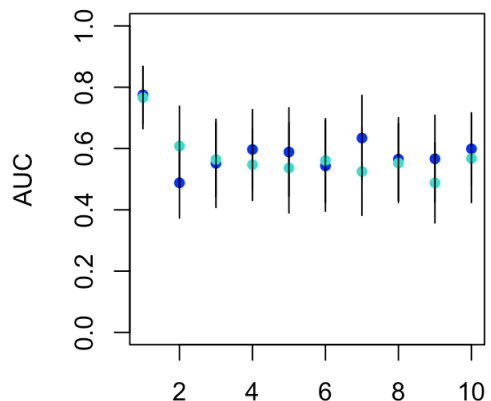

PC

**C**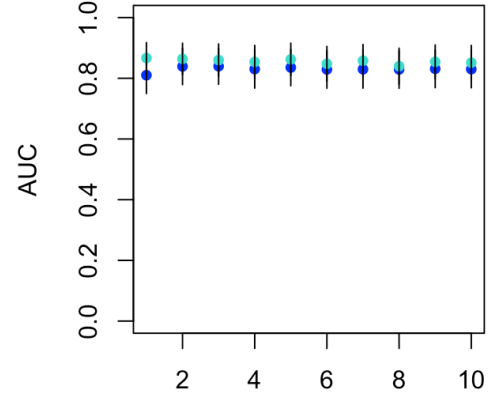

PC

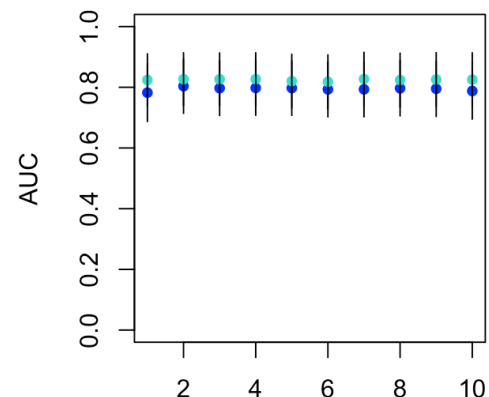

PC

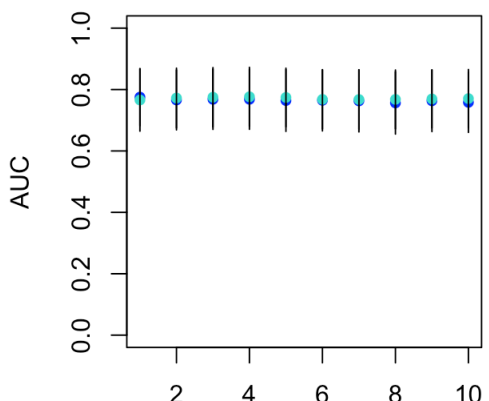

PC

**Supplemental Figure 1:** Validation of using the first principle component as module meta-gene.

Top row represents discovery cohort, middle row represents validation cohort 1 and bottom row represents validation cohort 2. A: Proportion of variance explained by the first 10 principle components of both modules. B: Predictive accuracy (AUC) using single principle components as metagenes in the classifier, demonstrating that the first principle component is the most informative (this is the definition of the module meta-gene). C: Accuracy achieved by sequentially adding principle components to the metagene computation in the GLM, demonstrating that adding higher principle components does not improve the classification accuracy.

### Discovery

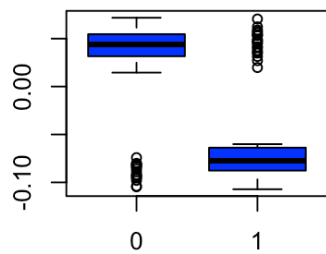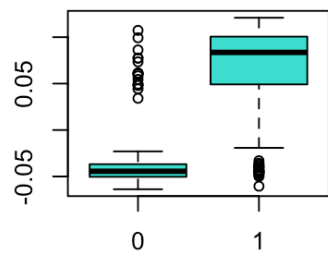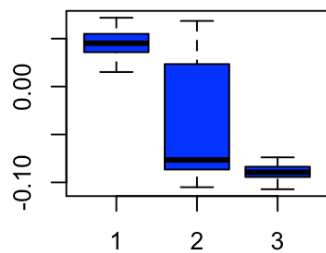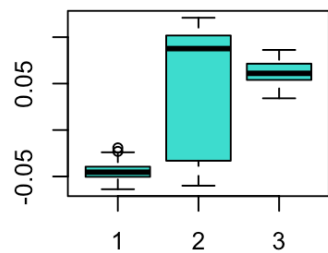

### Validation 1

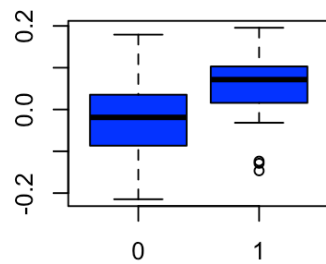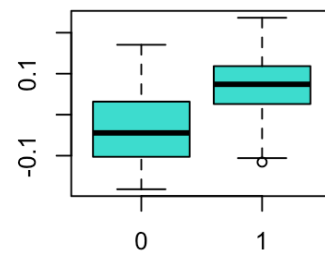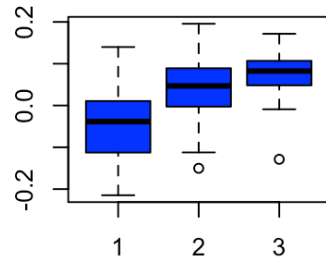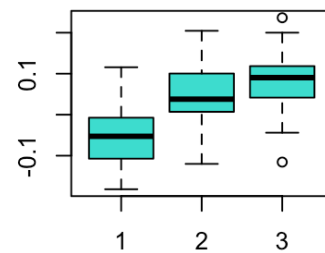

### Validation 2

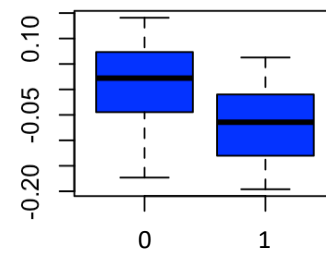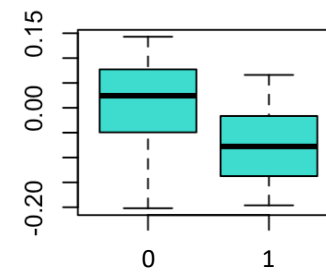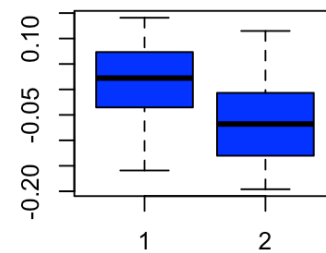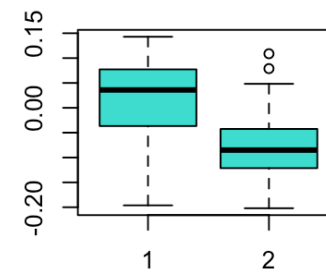

**Supplemental Figure 2:** Module metagenes are associated with recurrence and WHO grade in all cohorts. Top row is comparison of metagene scores by recurrence (0 = non-recurrent, 1 = recurrent) and bottom row is comparison of metagene score by WHO grade. We note that all comparisons are significant (t-test  $p < 0.05$  for recurrence and ANOVA  $p < 0.05$  for grade).

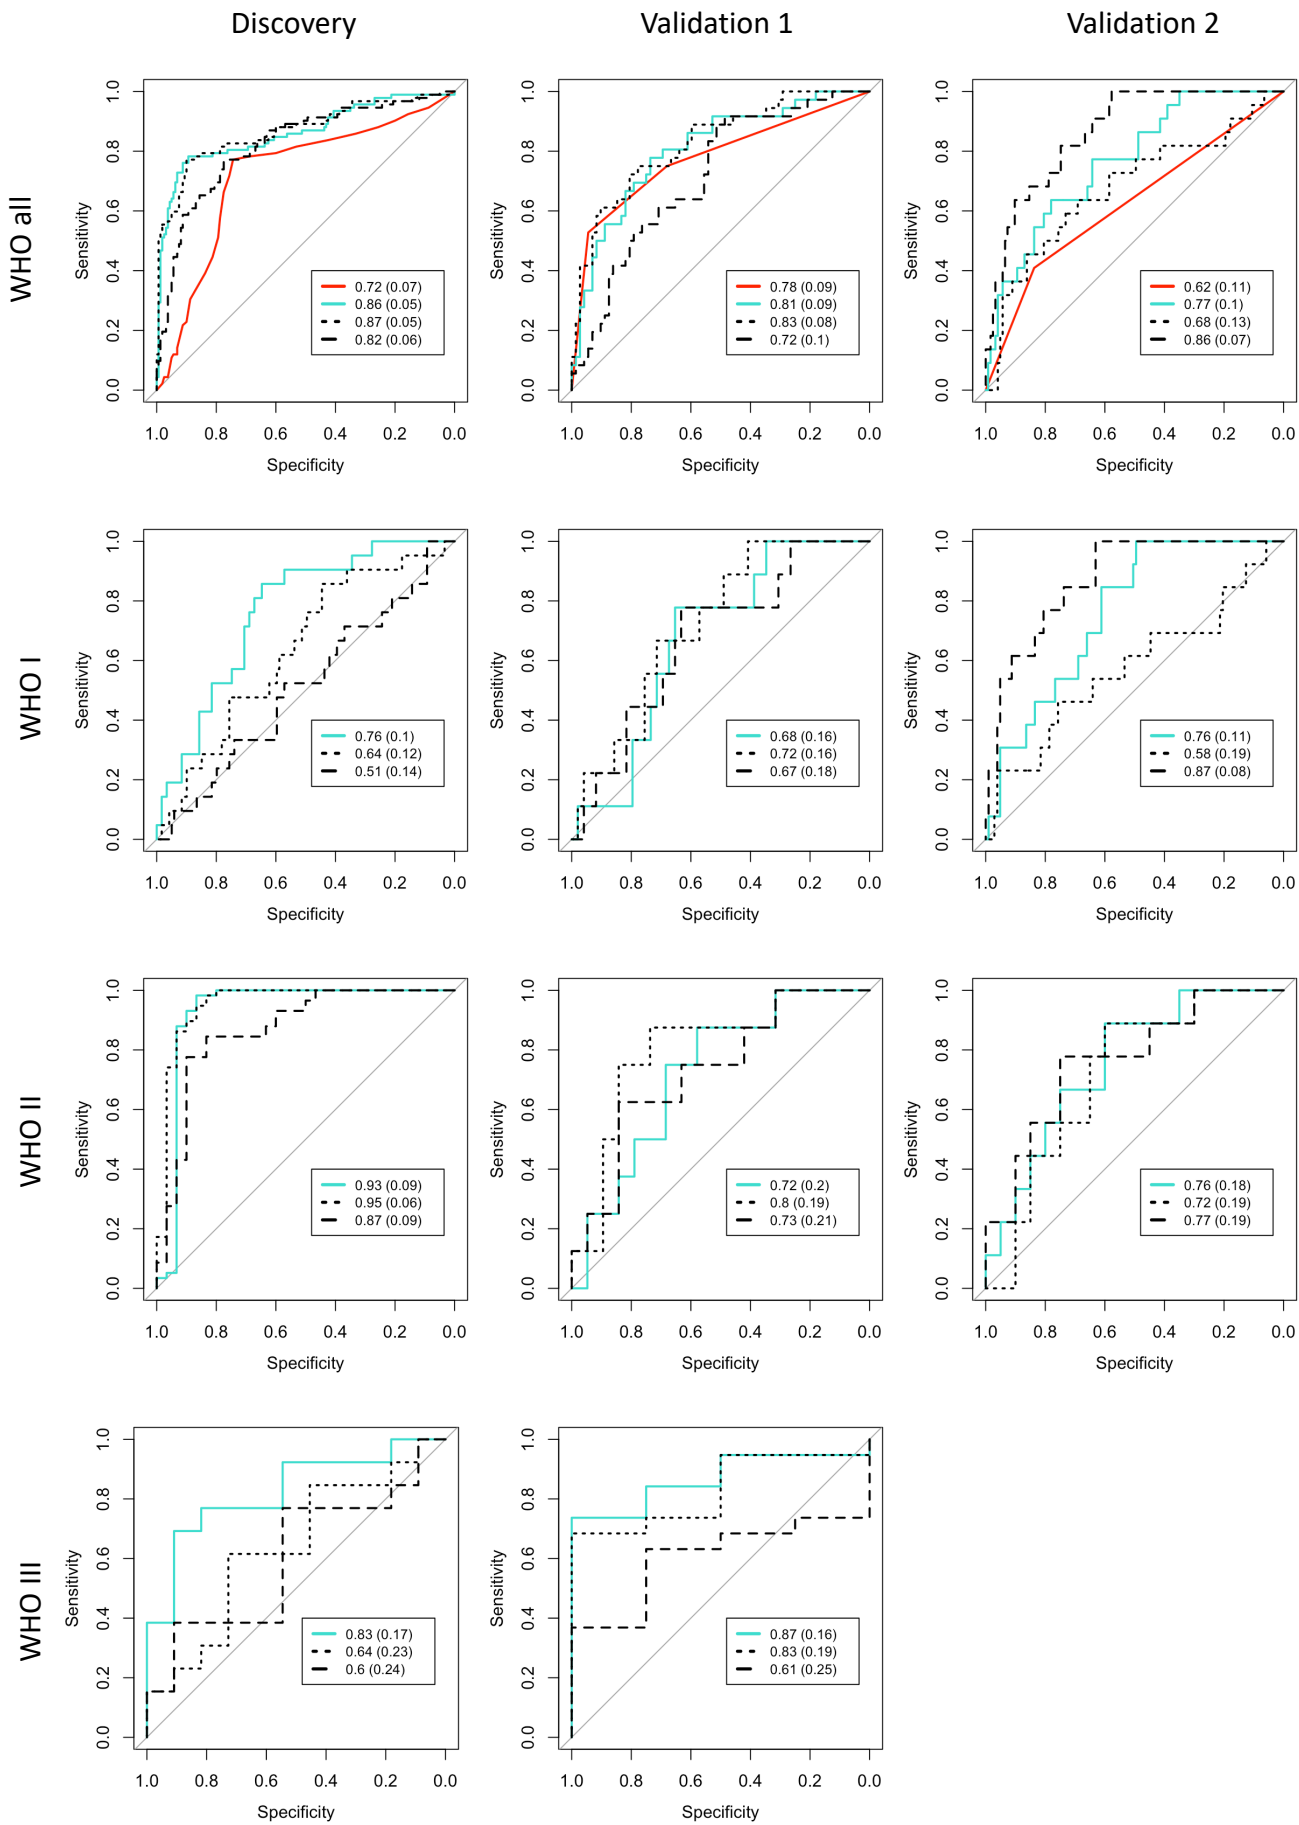

**Supplemental Figure 3:** Logistic regression classifier performance on sparse modules. For each receiver operative characteristic curve, turquoise represents the full E2F4/FOX M1-enriched module and black represents the sparse models (short dashed = sparse model 1 and long dashed = sparse model 2). The top row (including all WHO grades) includes a red curve which represents the predictive accuracy of WHO grade alone. Note that each model contains a single predictive variable (metagene or WHO grade). Models in rows 2-4 include only individual WHO grades as labeled. Columns (left to right) represent performance on the discovery cohort (10-fold cross validation), merged microarray validation cohort (Validation 1), and RNA-seq validation cohort (Validation 2). We note that neither sparse model exhibits consistently increased accuracy when compared to the full model, which supports the increased generalizability obtained by the redundancy of a larger model.

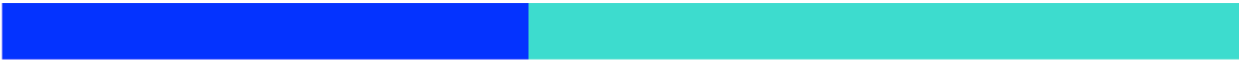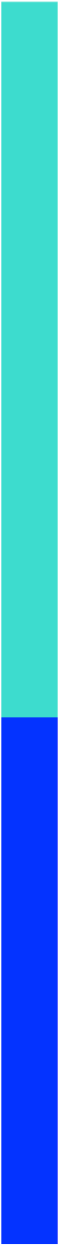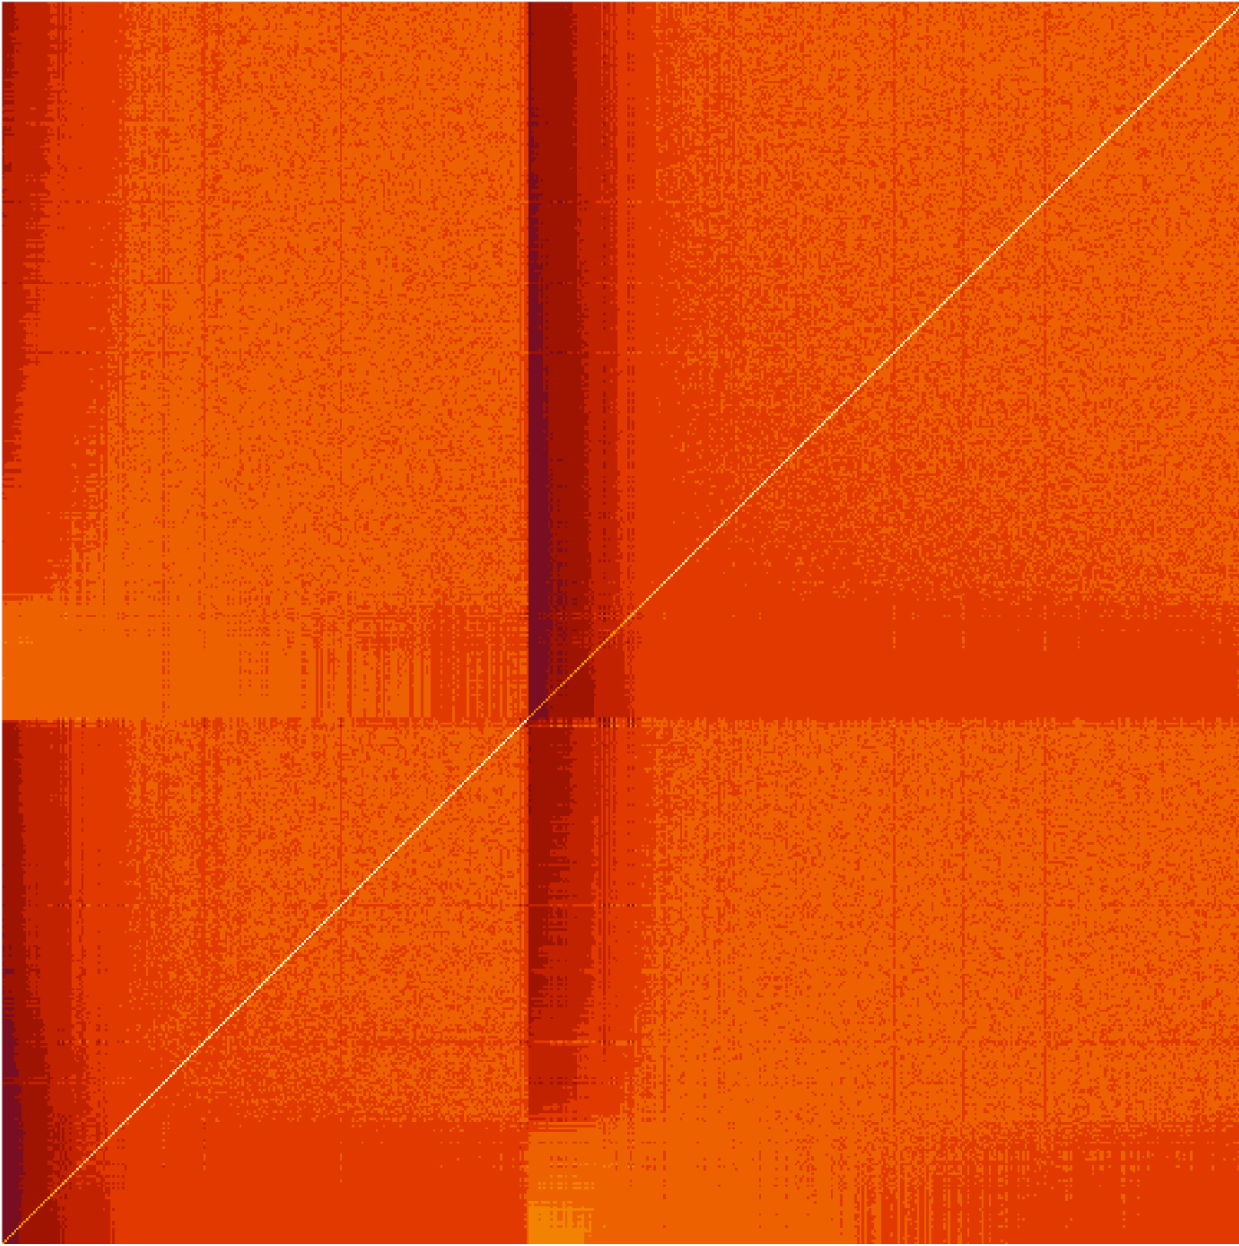

OPM  
 RPNV3  
 CQ33  
 CTR8  
 KJ1  
 QP1  
 R10R6  
 PTM6  
 R14  
 GPN2  
 S023  
 C0AM1  
 T0M1  
 C011  
 CTR5  
 CTR6  
 NDUF52  
 R10E  
 PRX1  
 R11  
 R12  
 R13  
 R14  
 R15  
 R16  
 R17  
 R18  
 R19  
 R20  
 R21  
 R22  
 R23  
 R24  
 R25  
 R26  
 R27  
 R28  
 R29  
 R30  
 R31  
 R32  
 R33  
 R34  
 R35  
 R36  
 R37  
 R38  
 R39  
 R40  
 R41  
 R42  
 R43  
 R44  
 R45  
 R46  
 R47  
 R48  
 R49  
 R50  
 R51  
 R52  
 R53  
 R54  
 R55  
 R56  
 R57  
 R58  
 R59  
 R60  
 R61  
 R62  
 R63  
 R64  
 R65  
 R66  
 R67  
 R68  
 R69  
 R70  
 R71  
 R72  
 R73  
 R74  
 R75  
 R76  
 R77  
 R78  
 R79  
 R80  
 R81  
 R82  
 R83  
 R84  
 R85  
 R86  
 R87  
 R88  
 R89  
 R90  
 R91  
 R92  
 R93  
 R94  
 R95  
 R96  
 R97  
 R98  
 R99  
 R100



**Supplemental Figure 4:** Heatmap representation of topological overlap map, clustered by module. Diagonal values are set to 0. Darker colours represent higher values.

**A**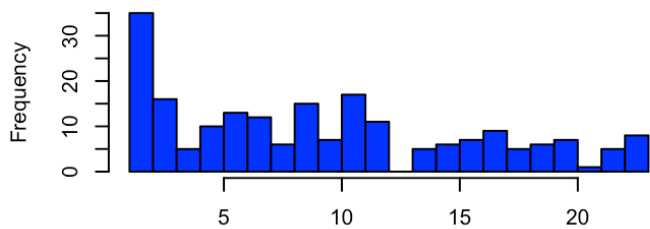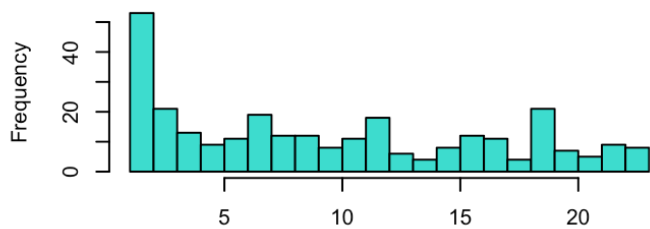**B**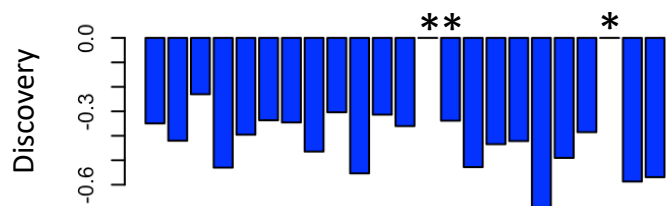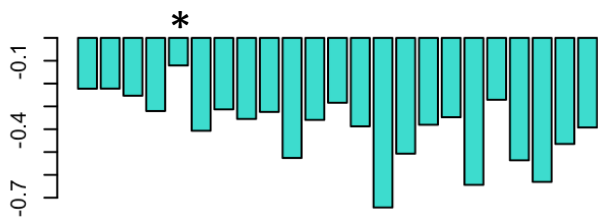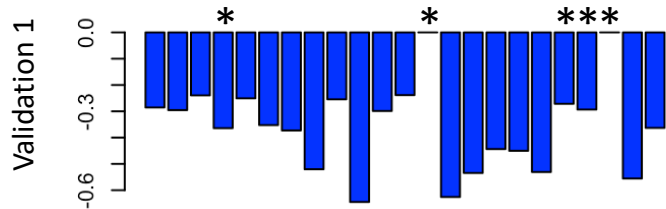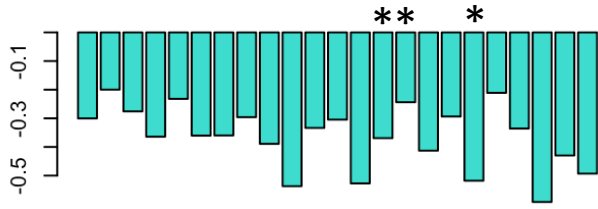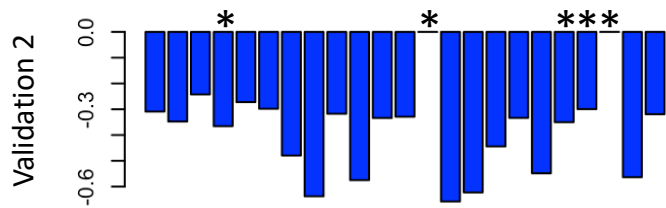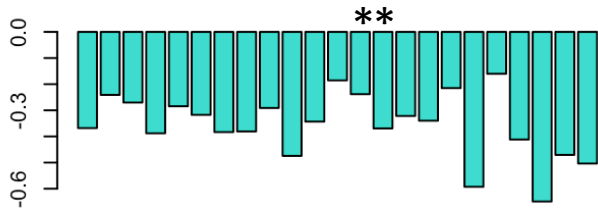

Chromosome

Chromosome

**Supplemental Figure 5:** Gene linkage analysis of module genes. A: Histogram representation of module gene loci by chromosome (23 is used to represent the X chromosome). Blue represents the SUZ12-enriched module and turquoise represents the E2F4/FOXO1-enriched module, as in the rest of the paper. We note that these genes are distributed throughout the genome in both modules, and do not reside within a single neighborhood. B: Correlation between gene co-expression and distance on each chromosome. For each pair of modules genes on a chromosome, the difference between their starting position and their co-expression (measured by Pearson correlation) is recorded, then the overall Pearson correlation computed and plotted. Notably, there is a significant negative correlation between gene distance and co-expression throughout the genome, suggesting the importance of regional gains/losses in meningioma biology and providing support to the gene-program-based approach. \*Correlation not significant ( $p > 0.05$ ).
